# Supplementary material for: Structural and Chemical Insights on the Incorporation of Americium into Monoclinic Zirconia (m-ZrO₂)
Source: Research Square preprint supplement (doi:10.21203/rs.3.rs-7027845/v1), 2025-07-11
Supplement: Supplementary file 1 [file 7339c333123fbebd5a9633b4.docx]

**Supporting Information**

*Communications Materials*

**Incorporation of Americium into Monoclinic Zirconia (ZrO₂): Structural and Chemical Insights**

Gabriel L. Murphy1,* Sara Gilson,2 Karin Popa,3 Damien Prieur,2 Sven M. Schenk,4 Sorin-Octavian Valu,3 Harry Ramanantoanina,4 Tim Prüßmann,4 Tonya Vitova,4 Kathy Dardenne,4 Jörg Rothe,4  Jean-Yves Colle,3 Olaf Walter,3 and Nina Huittinen2,5*

1*Institute of Fusion Energy and Nuclear Waste Management (IFN-2), Forschungszentrum Jülich GmbH, 52428 Jülich, Germany*

2*Institute of Resource Ecology, Helmholtz-Zentrum Dresden-Rossendorf, 01328 Dresden, Germany*

3*European Commission, Joint Research Centre (JRC), Karlsruhe, Germany*

4*Institute for Nuclear Waste Disposal (INE), Karlsruhe Institute of Technology 3640, D-76021 Karlsruhe, Germany*

*5Institute of Chemistry and Biochemistry, Freie Universität Berlin, 14195 Berlin, Germany*

*corresponding authors: Gabriel L. Murphy (g.murphy@fz-juelich.de), Nina Huittinen (n.huittinen@hzdr.de)

1. **Synchrotron X-ray Powder Diffraction**

Figure S1 displays Rietveld refinement profiles for 5 mol % Am-doped ZrO2 where the secondary cubic phase has been analysed using (top) C-type cubic Am2O3 type and (bottom) pyrochlore cubic type Am2Zr2O7 structures.





**Figure S1.** Rietveld fit of the PXRD data at ambient temperature for 5 mol % Am-doped ZrO2 using consistent *m-*ZrO2 monoclinic refinement models in addition to (top) C-type cubic Am2O3 type and (bottom) pyrochlore cubic type Am2Zr2O7 structures. The black crosses, upper red line, lower red line and vertical purple/blue/cyan markers respectively represent observed data, calculated profile, difference profile and allowed reflections for the *m*-ZrO2 (SG = *P*21/*c*), C-type Am2O3 (*Ia*-3) and pyrochlore-type Am2Zr2O7 (SG = *Fd*-3*m*) respectively.

1. **Raman Spectroscopic Analysis**

Results of peak fitting and subsequent mode assignment against the 5 mol % Am doped ZrO2.





**Figure S2.** Fitted Raman spectrum of the m-ZrO2 sample doped with 5 mol% ZrO2 using a monoclinic model..
